# Supplementary material
Source: publisher figshare collection journal article supplement (https://asha.figshare.com/articles/dataset/_/6170285)
Supplement: Supplementary file 1 [file 1]

## **Supplemental Appendix.** Examples of treatment procedures and plans.

### **1. Example of teaching episode for recasting procedure.**

|         |                                                                                                        |
|---------|--------------------------------------------------------------------------------------------------------|
| Teacher | And Blake, your pirate is called Patch, Patch has a sword! Whose sword is it?                          |
| Child   | Patch sword.                                                                                           |
| Teacher | It's Patch's sword.<br><br>Joey, your pirate Jake has a sword too! It looks sharp...whose sword is it? |

### **2. Example of teaching episode for cueing procedure.**

|         |                                                                                                        |
|---------|--------------------------------------------------------------------------------------------------------|
| Teacher | That's right! Sam's hat. And Blake, your pirate is called Patch, Patch has a sword! Whose sword is it? |
| Child   | Patch sword.                                                                                           |
| Teacher | Sorry?                                                                                                 |
| Child   | Patch sword.                                                                                           |
| Teacher | Patch sword????                                                                                        |
| Child   | Patch!!!!                                                                                              |
| Teacher | Patch? Or Patch's sword?                                                                               |
| Child   | It Patch sword!                                                                                        |
| Teacher | It's Patch's sword, you say that.                                                                      |
| Child   | It Patch's sword.                                                                                      |
| Teacher | It's Patch's sword!                                                                                    |

### 3. Sample treatment plans

| Goal: Regular past tense <i>-ed</i>                                                                                                                                                         |                                                                                                                                                                                                                                                                                                                                                                                                                                                                                                                                                                                                                                                                                                                                                                                                                                                                                                                                                                                                                                                     |                                                           |
|---------------------------------------------------------------------------------------------------------------------------------------------------------------------------------------------|-----------------------------------------------------------------------------------------------------------------------------------------------------------------------------------------------------------------------------------------------------------------------------------------------------------------------------------------------------------------------------------------------------------------------------------------------------------------------------------------------------------------------------------------------------------------------------------------------------------------------------------------------------------------------------------------------------------------------------------------------------------------------------------------------------------------------------------------------------------------------------------------------------------------------------------------------------------------------------------------------------------------------------------------------------|-----------------------------------------------------------|
| Target                                                                                                                                                                                      | Activity 1                                                                                                                                                                                                                                                                                                                                                                                                                                                                                                                                                                                                                                                                                                                                                                                                                                                                                                                                                                                                                                          | Materials                                                 |
| <p>squeaked<br/>miaowed<br/>purred<br/>barked<br/>oinked<br/>quacked<br/>neighed<br/>moored<br/>crowed<br/>baaed<br/>gobbled<br/>cackled<br/>cooed<br/>chattered<br/>roared<br/>croaked</p> | <ul style="list-style-type: none"> <li>• Sit in a circle. Teacher follows this script.</li> <li>• Teacher uses “Yesterday...” to elicit response from child, then follows procedure for recasting or cueing following child’s response.</li> </ul> <div style="border: 1px solid black; border-radius: 15px; padding: 10px; margin: 10px 0;"> <p>“We’re going to look at this book with pictures of animals in it.”<br/>“The speech bubble means the animal made a noise.”</p> <p>“Yesterday, these animals made lots of noises.”<br/>“Squeak! Squeak!”<br/>“Yesterday he squeaked.”<br/>“Tell me what the animal said yesterday; Yesterday...?”</p> </div> <ul style="list-style-type: none"> <li>• Talk about a page in the book</li> <li>• Model noise</li> </ul> <div style="border: 1px solid black; border-radius: 15px; padding: 10px; margin: 10px 0;"> <p>“Quack!”<br/>“What did the _____ (<i>animal</i>) say yesterday?”<br/>“Yesterday...?”</p> </div> <ul style="list-style-type: none"> <li>• Go through book <b>twice</b></li> </ul> | <p>Picture book<br/>(animals with<br/>speech bubbles)</p> |

Errors corrected on-line.

Scoring: Keep a record of the tally for each student.

Time: 15 minutes

| Goal: Possessive -s                                                                                                                                                                                          |                                                                                                                                                                                                                                                                                                                                                                                                                                                                                                                                                                                                                                                                                                                                                                                                                   |                           |
|--------------------------------------------------------------------------------------------------------------------------------------------------------------------------------------------------------------|-------------------------------------------------------------------------------------------------------------------------------------------------------------------------------------------------------------------------------------------------------------------------------------------------------------------------------------------------------------------------------------------------------------------------------------------------------------------------------------------------------------------------------------------------------------------------------------------------------------------------------------------------------------------------------------------------------------------------------------------------------------------------------------------------------------------|---------------------------|
| Target                                                                                                                                                                                                       | Activity 1                                                                                                                                                                                                                                                                                                                                                                                                                                                                                                                                                                                                                                                                                                                                                                                                        | Materials                 |
| <b>kangaroo's</b><br><b>Kathy's</b><br><b>koala</b><br><b>Kit's</b><br><b>Wombat's</b><br><b>Wez's</b><br><b>platypus</b><br><b>Puck's</b><br><b>kookaburra</b><br><b>Ed's</b><br><b>emu</b><br><b>Kit's</b> | <ul style="list-style-type: none"> <li>• Sit in a circle. Teacher follows this script.</li> <li>• Teacher uses "Whose X is that?" to elicit response from child, then follows procedure for recasting or cueing following child's response.</li> </ul> <div> <p>"You each have an Australian animal puppet. We are going to talk about them. I will tell you about what belongs to my kangaroo first. This is the kangaroo's tail." "My kangaroo is called Kathy. This is Kathy's white tummy."</p> </div> <ul style="list-style-type: none"> <li>• Pass puppet on to students to practice more features using <i>kangaroo's</i> and <i>Kathy's</i>.</li> <li>• Now ask each child to talk about their puppet.</li> </ul> <div> <p>"You have a wombat."<br/>                     "Whose nose is that?"</p> </div> | Australian animal puppets |

Errors corrected on-line.

Scoring: Keep a record of the tally for each student.

Time: 15 minutes
