# Supplementary material
Source: publisher figshare collection journal article supplement (https://asha.figshare.com/articles/dataset/_/6170285)

**Supplemental Figure 1.** Participant flow.

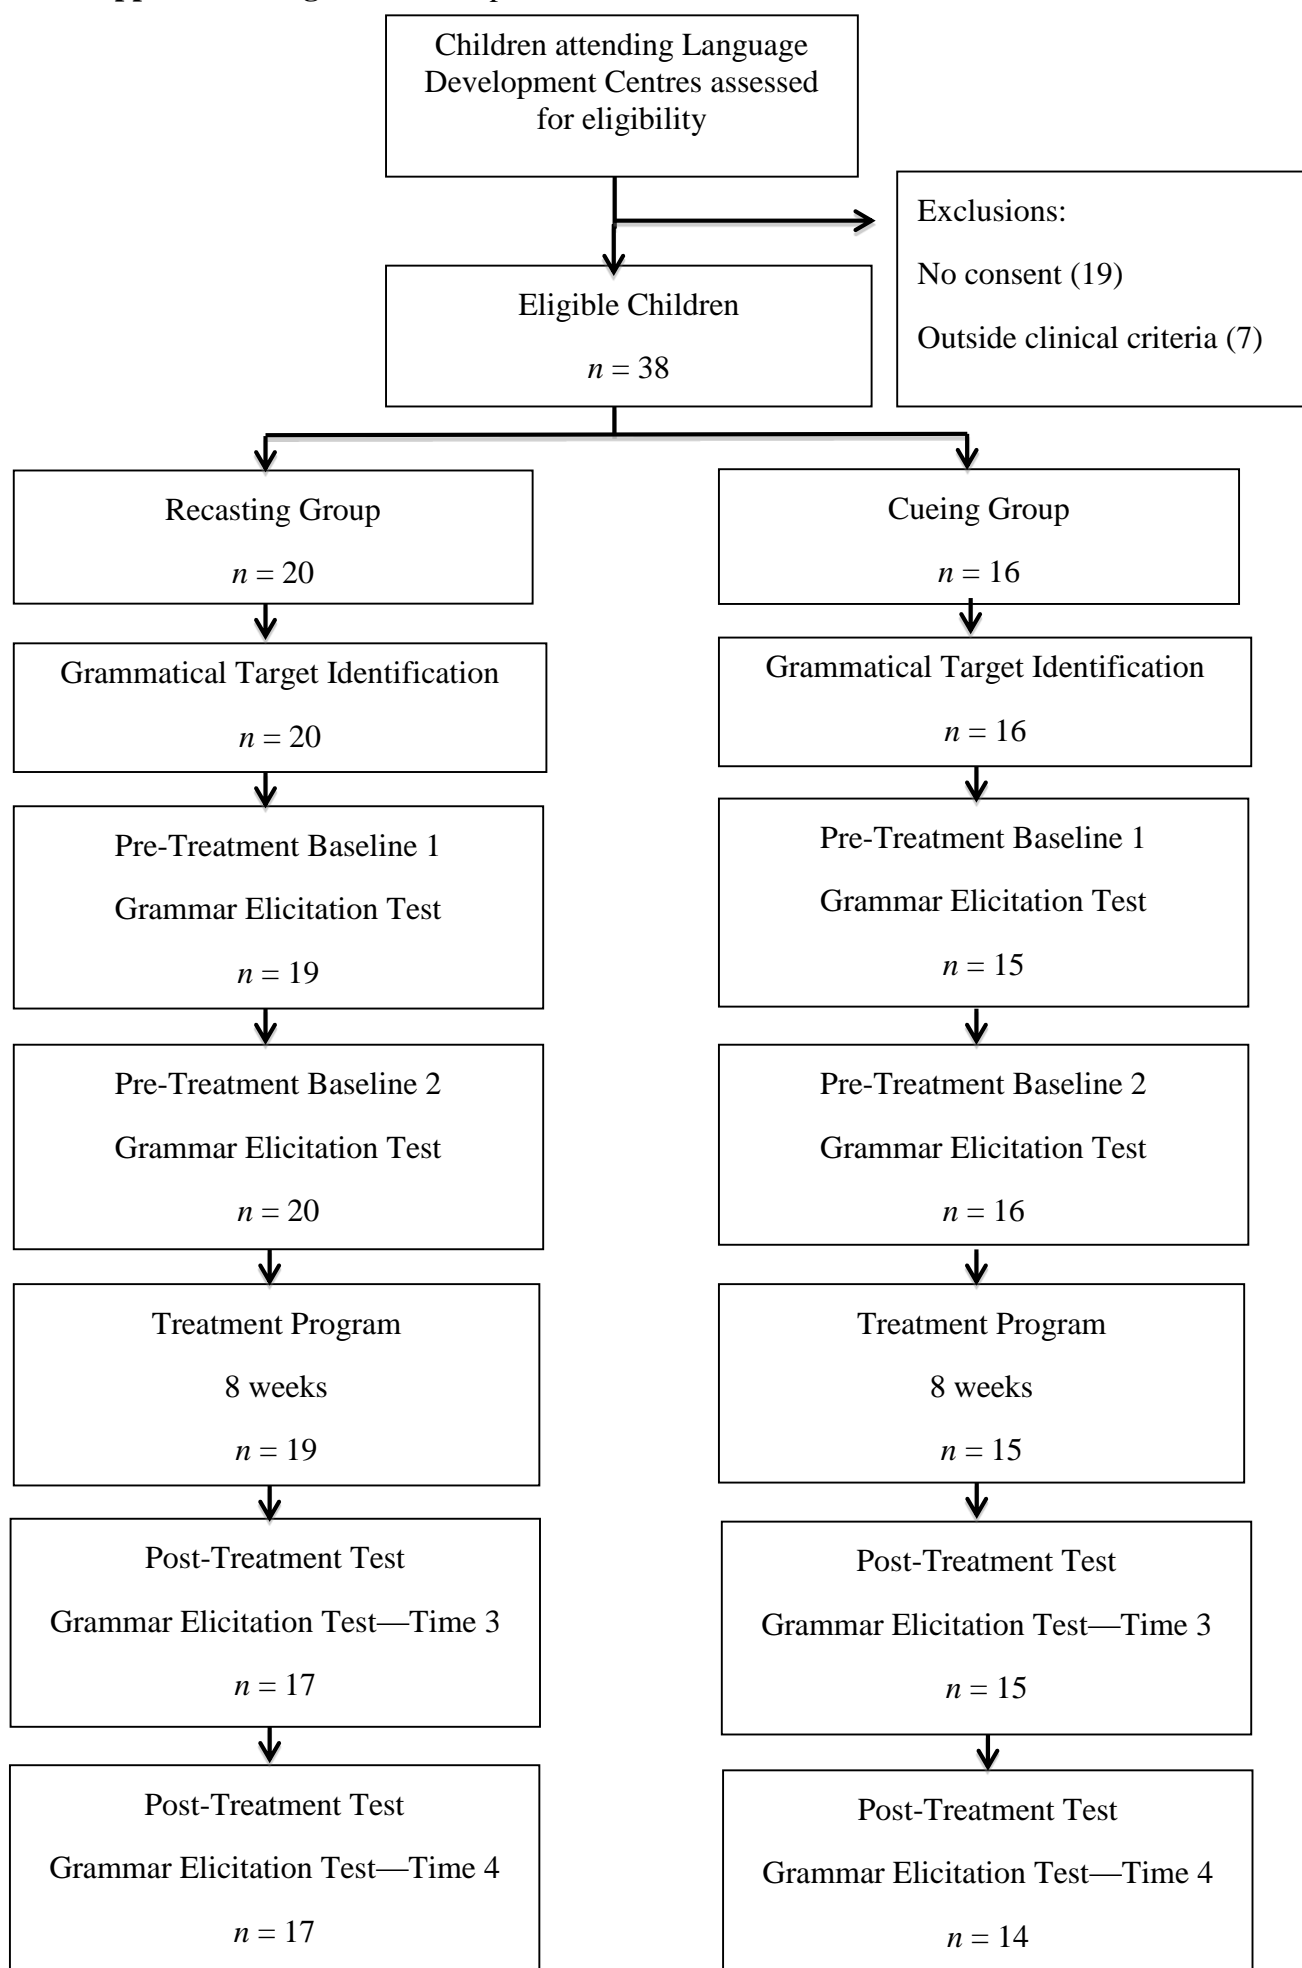

Supplement: Supplementary file 2 [file 1]

## Supplemental Materials. Treatment procedure.

### *Recasting*

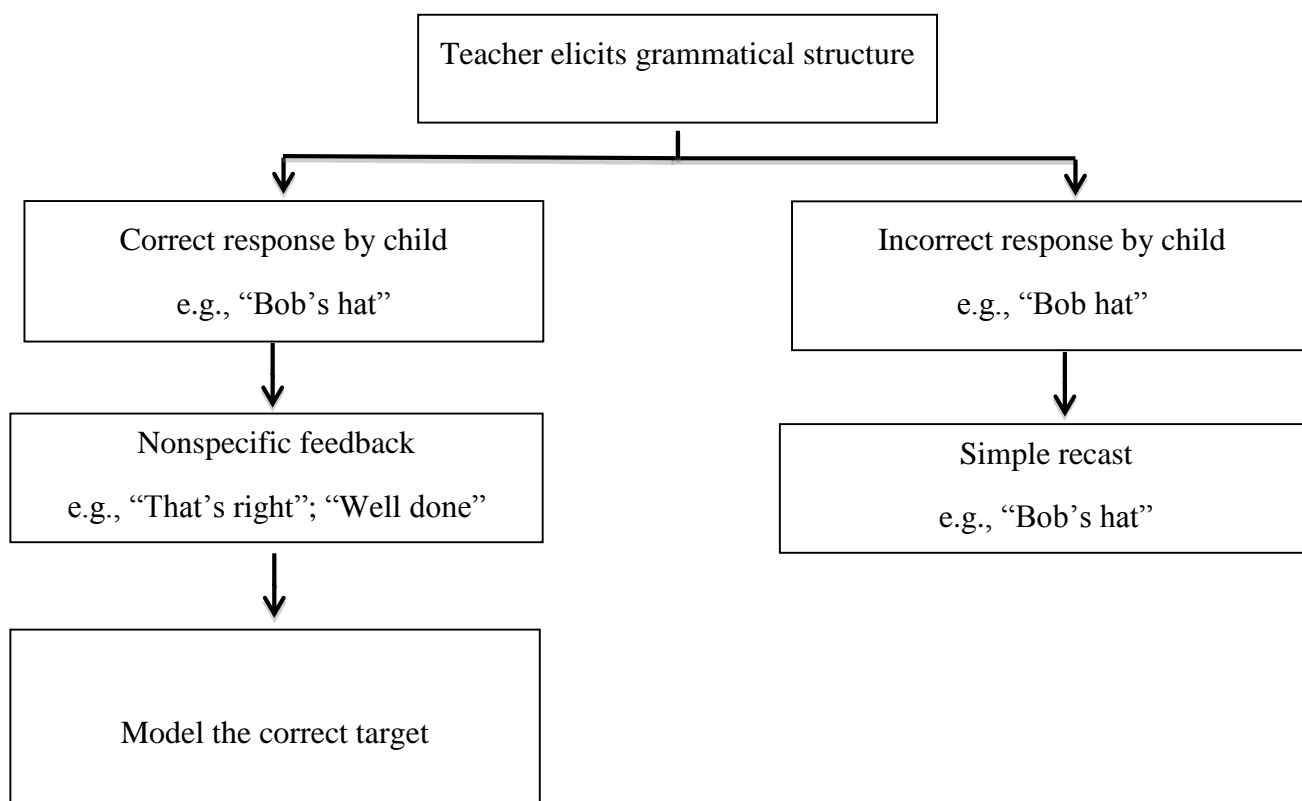

## Cueing

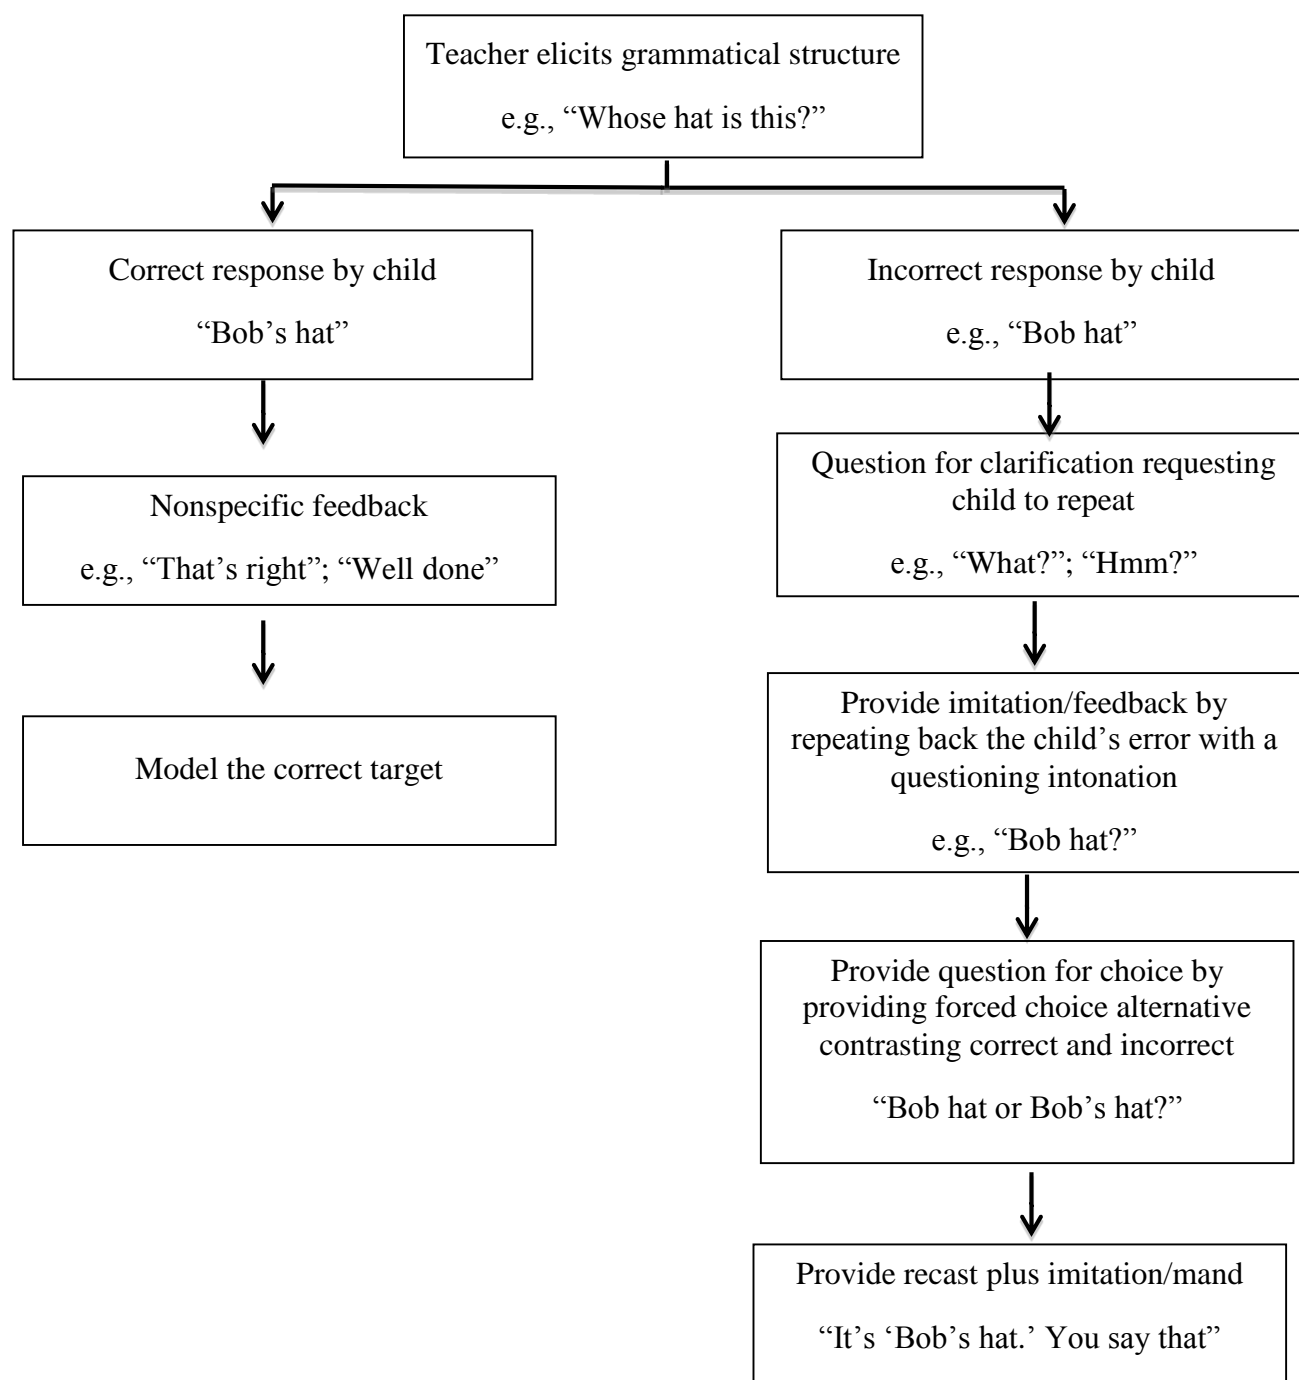

Supplement: Supplementary file 3 [file 1]
